# Supplementary material
Source: ML conference proceedings conference paper supplement (https://openaccess.thecvf.com/content/WACV2022/html/Chen_Mixed-Dual-Head_Meets_Box_WACV_2022_paper.html)
Supplement: Supplementary file 1 [file Chen_Mixed-Dual-Head_Meets_Box_WACV_2022_supplemental.pdf]

# Mixed-dual-head Meets Box Priors: A Robust Framework for Semi-supervised Segmentation

## – Supplementary Material –

Chenshu Chen   Tao Liu   Wenming Tan   Shiliang Pu  
Hikvision Research Institute

{chenchenshu, liutao46, tanwenming, pushiliang.hri}@hikvision.com

### A. Pseudo code of training

We summary one training round of our framework in Algorithm 1. The training set consists of two parts: the fully labeled dataset  $\mathcal{F} = \{(x_i, y_i, b_i)\}_{i=1}^F$  containing  $F$  fully labeled images and the weakly labeled dataset  $\mathcal{W} = \{(x_i, b_i)\}_{i=1}^W$  containing  $W$  weakly labeled images, where  $x_i$  denotes  $i$ -th image,  $y_i$  and  $b_i$  denote its ground-truth mask and bounding box label.

### B. The effectiveness of priors

We show the additional experiment results about adding priors or not in Table 9. It can be seen that both position and class priors can improve the performance, and combining the both can yield further improvements.

|                    | Backbone   | $F$  | $W$  | mIoU  |
|--------------------|------------|------|------|-------|
| w/o priors         | ResNet-50  | 1464 | 9118 | 79.30 |
| w/ position priors | ResNet-50  | 1464 | 9118 | 79.78 |
| w/ class priors    | ResNet-50  | 1464 | 9118 | 80.49 |
| w/ both priors     | ResNet-50  | 1464 | 9118 | 81.31 |
| w/o priors         | ResNet-101 | 1464 | 9118 | 80.65 |
| w/ position priors | ResNet-101 | 1464 | 9118 | 81.14 |
| w/ class priors    | ResNet-101 | 1464 | 9118 | 82.56 |
| w/ both priors     | ResNet-101 | 1464 | 9118 | 82.82 |

Table 9. Additional experiment results for Table 2 of the main paper on PASCAL VOC 2012 val set.  $F$  and  $W$  are the numbers of fully labeled images and weakly labeled images respectively.

### C. Selection of AnnNet

Table 10 shows the performance of SegNet when choosing different network as AnnNet. It can be seen that SegNet can achieve better results with a stronger AnnNet.

---

#### Algorithm 1: One Training Round of Our Framework

---

**Input:** Fully labeled dataset  $\mathcal{F} = \{(x_i, y_i, b_i)\}_{i=1}^F$ ,  
weakly labeled dataset  $\mathcal{W} = \{(x_i, b_i)\}_{i=1}^W$ , a  
mixing ratio  $r$ , AnnNet  $g_\varphi$  parameterized by  $\varphi$ ,  
SegNet  $f_\theta$  parameterized by  $\theta$

**Output:** SegNet  $f_\theta$

##### 1. AnnNet training:

Obtain proposal masks  $\mathcal{Y}^p = \{y_i^p\}_{i=1}^W$  for  $\mathcal{W}$  as in  
Figure 2 of the main paper.

Update  $\mathcal{W} = \{x_i, y_i^p, b_i\}_{i=1}^W$ .

##### for each iteration do

Sample a batch  $\mathcal{B}^S$  from  $\mathcal{F}$  and  $\mathcal{W}$  with a  
mixing ratio  $r$  for strong head.

Sample a batch  $\mathcal{B}^W$  from  $\mathcal{W}$  for weak head.

Add position and class priors for images in  $\mathcal{B}^S$   
and  $\mathcal{B}^W$ .

Perform a forward inference on  $\mathcal{B}^S$  and  $\mathcal{B}^W$   
using  $g_\varphi$ .

Calculate loss and update  $\varphi$  by SGD.

end

##### 2. Pseudo mask generation:

Obtain prediction results  $\hat{\mathcal{Y}} = \{\hat{y}_i\}_{i=1}^W$  for  $\mathcal{W}$   
using  $g_\varphi$ .

Obtain pseudo masks  $\tilde{\mathcal{Y}} = \{\tilde{y}_i\}_{i=1}^W$  by Eq.(3).

Update  $\mathcal{W} = \{x_i, \tilde{y}_i, b_i\}_{i=1}^W$ .

##### 3. SegNet training:

##### for each iteration do

Sample a batch  $\mathcal{B}^S$  from  $\mathcal{F}$  and  $\mathcal{W}$  with a  
mixing ratio  $r$  for strong head.

Sample a batch  $\mathcal{B}^W$  from  $\mathcal{W}$  for weak head.

Perform a forward inference on  $\mathcal{B}^S$  and  $\mathcal{B}^W$   
using  $f_\theta$ .

Calculate loss and update  $\theta$  by SGD.

end

---

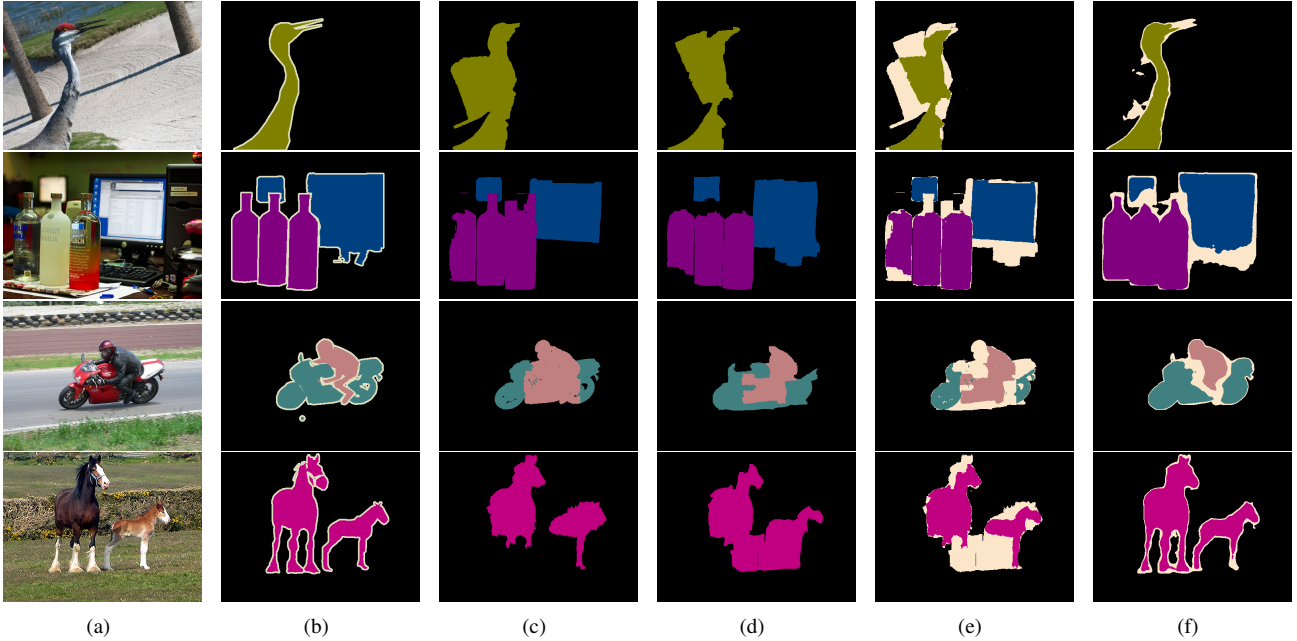

Figure 9. Visualization of proposal masks and pseudo masks. (a) Image. (b) Ground truth. (c) Proposal masks produced by GrabCut. (d) Proposal masks produced by MCG. (e) Proposal masks by fusing (c) and (d). (f) Pseudo masks produced by AnnNet.

| AnnNet      |            | SegNet                | $F$  | $W$  | MS | mIoU  |
|-------------|------------|-----------------------|------|------|----|-------|
| Deeplabv3+  | ResNet-101 | Deeplabv3+ ResNet-50  | 1464 | 9118 |    | 80.20 |
| Deeplabv3+  | ResNet-101 | Deeplabv3+ ResNet-50  | 1464 | 9118 | ✓  | 81.30 |
| Deeplabv3+  | ResNet-101 | Deeplabv3+ ResNet-101 | 1464 | 9118 |    | 81.52 |
| Deeplabv3+  | ResNet-101 | Deeplabv3+ ResNet-101 | 1464 | 9118 | ✓  | 83.19 |
| HRNetV2-W48 |            | Deeplabv3+ ResNet-50  | 1464 | 9118 |    | 81.31 |
| HRNetV2-W48 |            | Deeplabv3+ ResNet-50  | 1464 | 9118 | ✓  | 82.26 |
| HRNetV2-W48 |            | Deeplabv3+ ResNet-101 | 1464 | 9118 |    | 82.82 |
| HRNetV2-W48 |            | Deeplabv3+ ResNet-101 | 1464 | 9118 | ✓  | 83.78 |

Table 10. Results on PASCAL VOC 2012 val set when using different networks for AnnNet and SegNet. “MS” denotes using multi-scale and left-right flipped inputs at inference time.

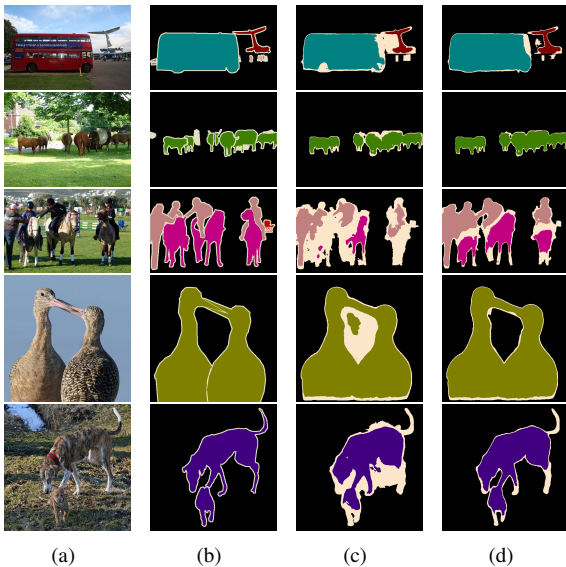

Figure 8. Visualization of pseudo masks produced by AnnNet in different rounds of iterative training. (a) Image. (b) Ground truth. (c) Pseudo masks in round 1. (d) Pseudo masks in round 4.

## D. Qualitative results of iterative training

Figure 8 shows some pseudo masks generated by the AnnNet in different rounds of iterative training. It shows that the pseudo masks can be further refined through iterative training.

## E. Segmentation labels

Figure 9 shows different segmentation labels. It can be seen that the original proposal masks produced by GrabCut (Figure 9(c)) and MCG (Figure 9(d)) are very coarse. Though the fused results (Figure 9(e)) of GrabCut and MCG proposals can ignore some potential mislabeled pixels, they are still far from precise. In comparison, the pseudo masks generated by the AnnNet (Figure 9(f)) are much more accurate.

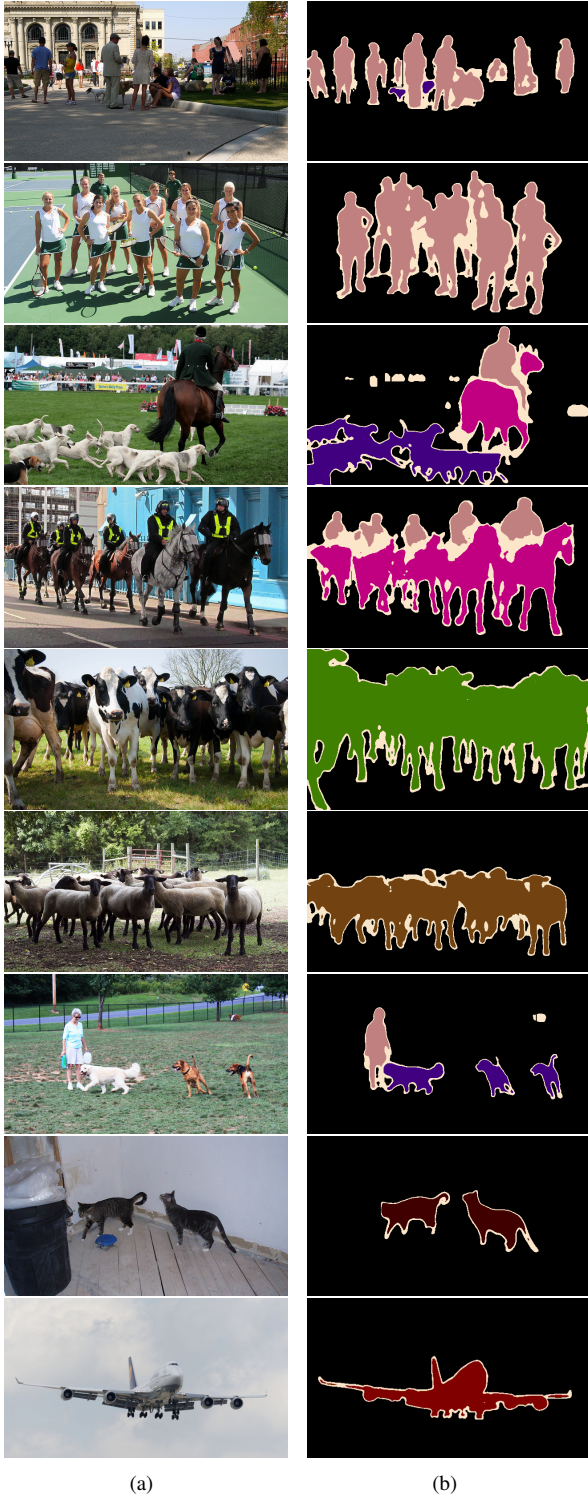

## F. Pseudo masks of COCO dataset

Figure 10 shows some pseudo masks of COCO dataset generated by the AnnNet. It can be seen that AnnNet is able to generate high quality pseudo masks for simple scenarios. Even in more complex scenarios, the pseudo masks are also satisfying.

Figure 10. Visualization of some pseudo masks of COCO dataset. The first six rows show some complex scenarios, and the last three rows show some simple scenarios. (a) Image. (b) Pseudo mask
